# Supplementary material for: Apigenin blocks IKKα activation and suppresses prostate cancer progression
Source: PubMed Central journal article supplement (PMC4741599; doi:10.18632/oncotarget.5157), 2015-09-05
Supplement: oncotarget-06-31216-s001.pdf [file oncotarget-06-31216-s001.pdf]

## SUPPLEMENTARY FIGURES LEGENDS

```

IKKA_HUMAN MERPPGLRPGAGGPWEMRERLGTGGFGNVCLYQHRELDLKI AIKSCRLELSTKNRERWCH 60
IKKB_HUMAN MSWSPSLTTQT CGAWEMKERLGTGGFGNVIRWHNQETGEQIAIKQCRQELS PRNRERWCL 60

IKKA_HUMAN EI QIMKKLNHANVVKACDVPEELN-ILIH DVPLLAMEYCSGGDLRKL LNKPENCCGLKES 119
IKKB_HUMAN EI QIMRRLTHPNVVAARDVPEGMQNLAPNDL PLLAMEY CQGDLRKYLNQFENCCGLREG 120

IKKA_HUMAN QILSLLSDIGSGIRYLHENKIIHRDLKPENIVLQDVGGKIIHKIIDLGYAKD V DQGS LCT 179
IKKB_HUMAN AILTLLSDIASALRYLHENRIIHRDLKPENIVLQQGEQRLIHKIIDLGYAKELDQGS LCT 180

IKKA_HUMAN SFVGT LQYLAPELFENKPYTATVDYWSFGTMVFE CIAGYRPFLHHLQPF TWHEKIKKKDP 239
IKKB_HUMAN SFVGT LQYLAPELLEQQKYTVTVDYWSFGTLAFECITGFRPFLPNWQPVQWHSKVRQKSE 240

IKKA_HUMAN KCI FACEEMSGEVR FSSHLPQPN SLCLIVEPMENWLQ LMLNWD PQRG GPVDLTLKQPR 299
IKKB_HUMAN VDIVVSEDLNGTVKFSSSLPY PNNLNSVLAERLEKWLQ LMLMWH PRQRG--TDPT YGPN G 298

IKKA_HUMAN CFV LMDHILNLKIVHILNMTSAKII SFLLPPDES LHSLSQSR IERETGINTGSQELLSETG 359
IKKB_HUMAN CFKALDDILNLKLVHILNMVTGTIHTYPVTEDES LQSLKARIQQDTGIPEEDQELLQEAG 358

IKKA_HUMAN ISLDPRK PASQC VLDG----VRGCDSY MVYLF DKS KTVYEGPFASRSLSDCVNYIVQDSK 415
IKKB_HUMAN LALIPDKPATQCISDGKLN EGH TLDMDLVFLFDNSKIT YETQISPRPQPESVSCILQEPK 418

IKKA_HUMAN IQLP I IQLRKVWAEAVHYV SGLKEDYSR L FQ GQRAAML SLLRYNANLTKMKNTLISASQQ 475
IKKB_HUMAN RNLAFFQLRKVWGQVWHSIQTLKEDCNRLQGGQRAAMNLLRNSCLSKMKNSMASMSQQ 478

IKKA_HUMAN LKAKLEFFHKS IQLDLERYSEQMTYGISSEKMLKAWKEME EKAIHYAEVGVIGYLEDQIM 535
IKKB_HUMAN LKAKLDFFKTSIQIDLEKYSEQTEFGITSDKLL LAWREMEQAVELCGRENEVKLLVERMM 538

IKKA_HUMAN SLHAEIMELQKSPYGRRQGDLMESLEQRAIDLYKQLKHRPSD-HSYSDSTEMVKIIVHTV 594
IKKB_HUMAN ALQTDIVDLQRS PMGRKQGGTLD DLEE QARELYRRLREKPRDQRTEGDSQEMVRLLLQAI 598

IKKA_HUMAN QSQDRVLKELFGHLSKLLGCKQKIIDL LPKVEVALSNIKEADNTVMFMQGKRQKEIWHLL 654
IKKB_HUMAN QSF EKVRVIYTQLS KTVVCKQKALELLPKVEEVVSLMNEDEKTVVRLQEKRQKELWNLL 658

IKKA_HUMAN KIACTQSSARSLVGS SLEGAVTPQTSAWLPPTSAEHDHSLSCVVT PQDGETSAQMIEENL 714
IKKB_HUMAN KIA CSK--VRGPVSGSPD---SMNASRLSQPGQLMSQPSTASNSLPEPAKKSEELVAEAH 713

IKKA_HUMAN NCLGHLSTIIHEANEEQGNSMMNLDWSWLTE----- 745
IKKB_HUMAN NLCTLLENAIQD TVREQDQSFTALDWSWLQTEEEHSCLEQAS 756

```

Supplementary Figure S1: Pairwise alignment of human IKK $\alpha$  and IKK $\beta$  protein sequences.

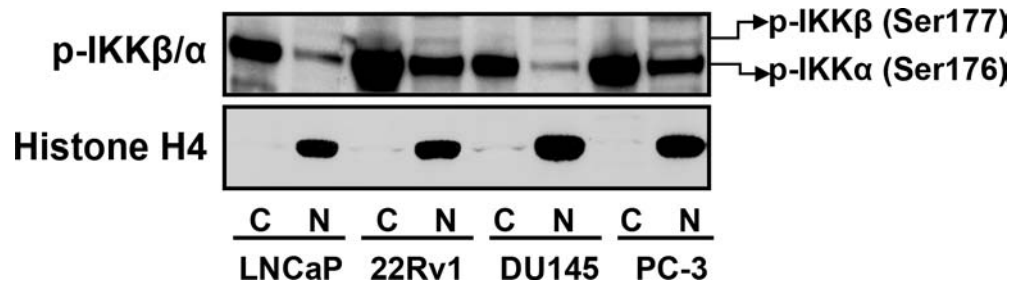

**Supplementary Figure S2: Subcellular distribution of *p*-IKK $\alpha/\beta$  in human prostate cancer cells.** Western blotting for *p*-IKK $\alpha/\beta$  protein expression in various human prostate cancer cells: LNCaP, 22Rv1, DU145 and PC-3 in the cytosolic and nuclear fractions. Prostate cancer 22Rv1 and PC-3 cells exhibited high *p*-IKK $\alpha/\beta$  expression in the nuclear fraction as well as in the cytosol, compared to LNCaP and DU145 cells. Histone H4 served as loading control. Details are described in 'materials and methods' section.

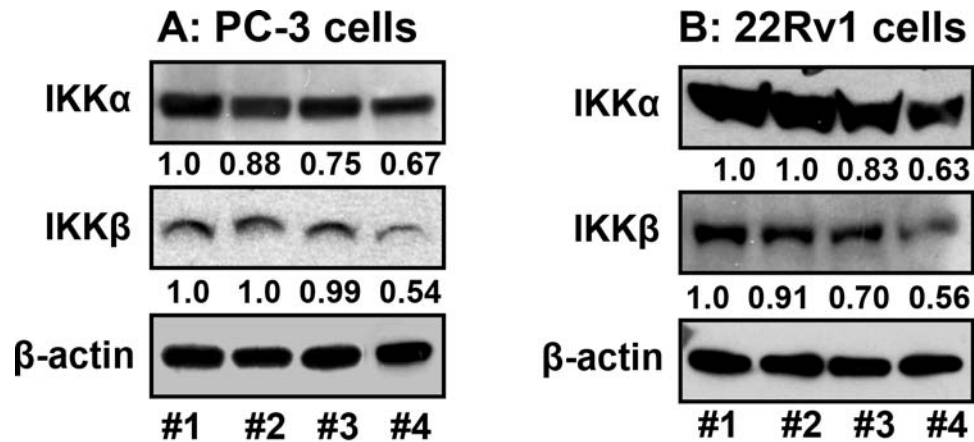

1. Control-negative shRNA
2. Scrambled negative control shRNA
3. IKKα/IKKβ shRNA1
4. IKKα/IKKβ shRNA2

**Supplementary Figure S3: Knockdown of IKKα and IKKβ in human prostate cancer cells.** A. PC-3 and B. 22Rv1 cells were infected with a pool of viral particle containing 3 target specific IKKα and IKKβ constructs shRNA retroviral particle and one scrambled and one with negative shRNA, selected with polybrene for 15–20 passage and Western blotting was performed for IKKα and IKKβ. A significant decrease in IKKα and IKKβ protein expression by shRNA2 was observed in both cell lines used for cell cycle analysis. Lane 1, control-negative shRNA, Lane 2, scrambled negative control-shRNA, Lane 3, IKKα or IKKβ shRNA1 and Lane 4, IKKα or IKKβ shRNA2. β-Actin was used as loading control. Numeric values represent the protein level normalized to the loading control (actin). Details are described in ‘materials and methods’ section.

### Treatment protocol

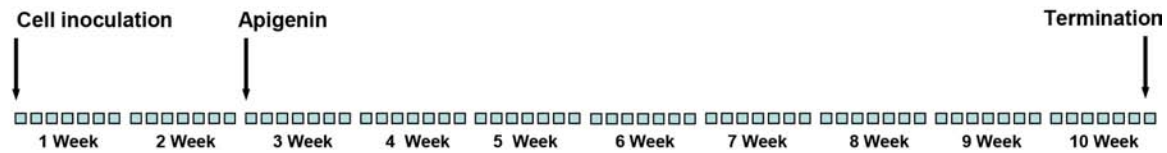

#### A: PC-3 Tumors

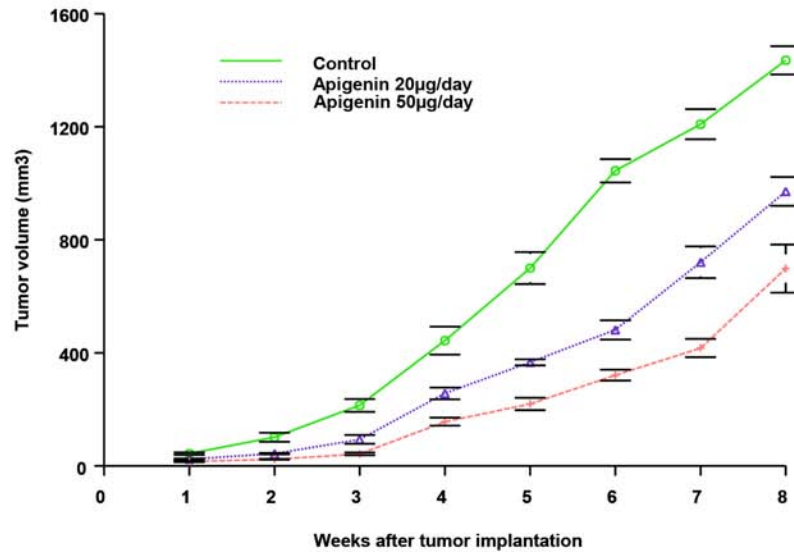

#### B: 22Rv1 Tumors

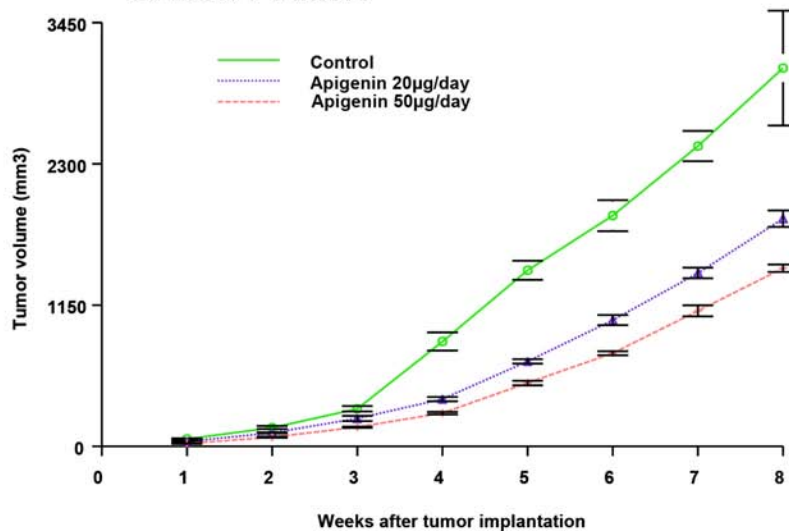

**Supplementary Figure S4: Effect of apigenin on prostate tumor growth inhibition in athymic nude mouse xenograft.** A. PC-3 and B. 22Rv1 tumors. Approximately 1 million cells were injected into both flanks of each mouse to initiate prostate tumor xenograft, and apigenin was provided to the animals 2 week after cell inoculation. Mice were fed ad libitum with Teklad 8760 autoclaved high-protein diet. Apigenin was provided with 0.5% methylcellulose and 0.025% Tween-20 as vehicle to these animals perorally on a daily basis. Group I, control, received 0.2 mL vehicle only, II group received 20 µg apigenin per mouse in 0.2 mL vehicle, and III group received 50 µg apigenin per mouse in 0.2 mL vehicle daily for 8 week and experiment was terminated. Once the tumor xenografts started growing, their sizes were measured by volume twice weekly in two dimensions throughout the study. Values are Mean ± SE,  $n = 6-8$ , repeated twice with similar results.  $**P < 0.001$ , compared to vehicle treated control.

**A: PC-3 Tumors**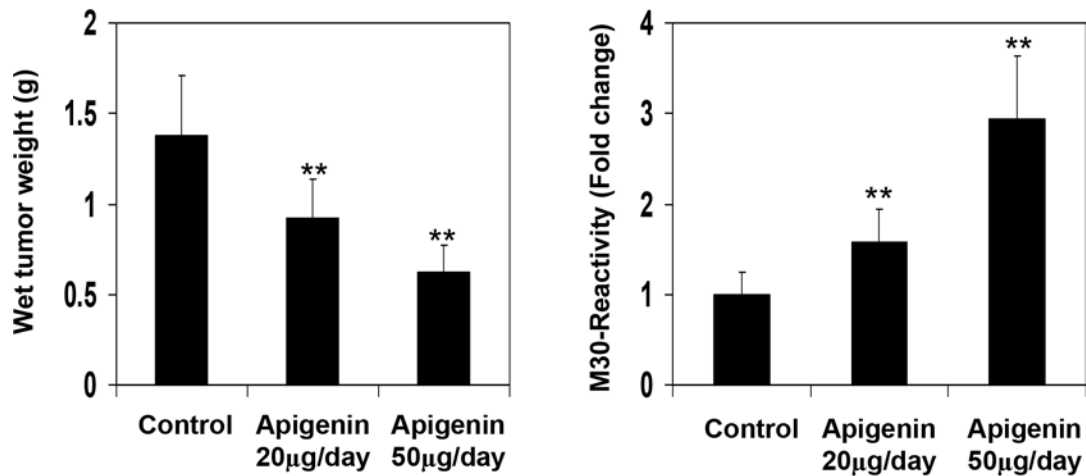**B: 22Rv1 Tumors**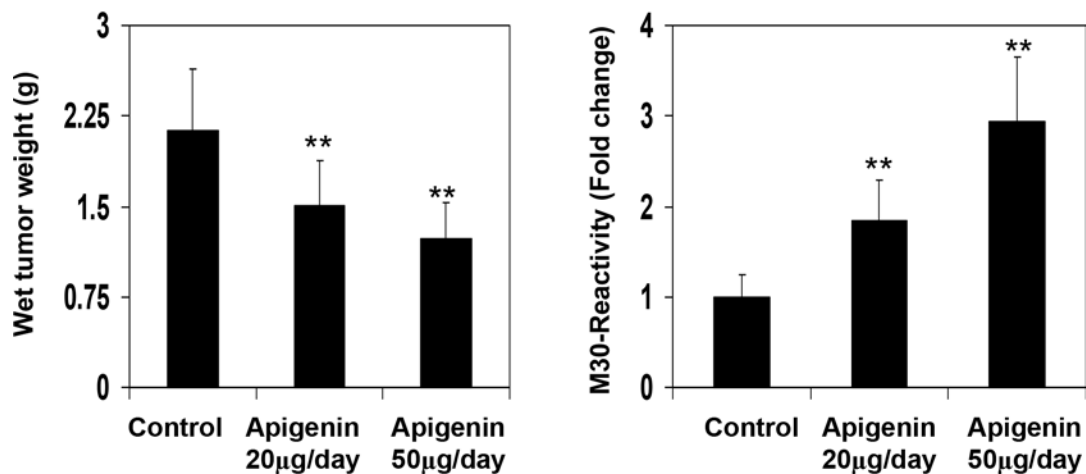

**Supplementary Figure S5: Effect of apigenin on prostate tumor weight and induction of apoptosis in athymic nude mouse xenograft.** A. PC-3 and B. 22Rv1 tumors obtained after tumor implantation and feeding mice with 20- and 50- µg apigenin in 0.2 ml vehicle daily for 8 weeks. Details are described in Supplemental figure 4. Wet weight of tumors is represented as the mean of 6–8 tumors from each group and quantitative measurement of apoptosis as demonstrated by M30 reactivity in PC-3 and 22Rv1 tumors after apigenin intake at the indicated doses. Values are Mean  $\pm$  SD,  $n = 6-8$ , repeated twice with similar results. \*\* $P < 0.001$ , compared to vehicle treated control.
